# Supplementary material for: Comparison of microbiological diagnosis of urinary tract infection in young children by routine health service laboratories and a research laboratory: Diagnostic cohort study
Source: PLOS journal article supplement (doi:10.1371/journal.pone.0171113), 2017-02-15
Supplement: S2 (10.1371/journal.pone.0171113.s002) [file journal.pone.0171113.s002]

**S2 Fig. Distribution of clinician global illness severity scale**

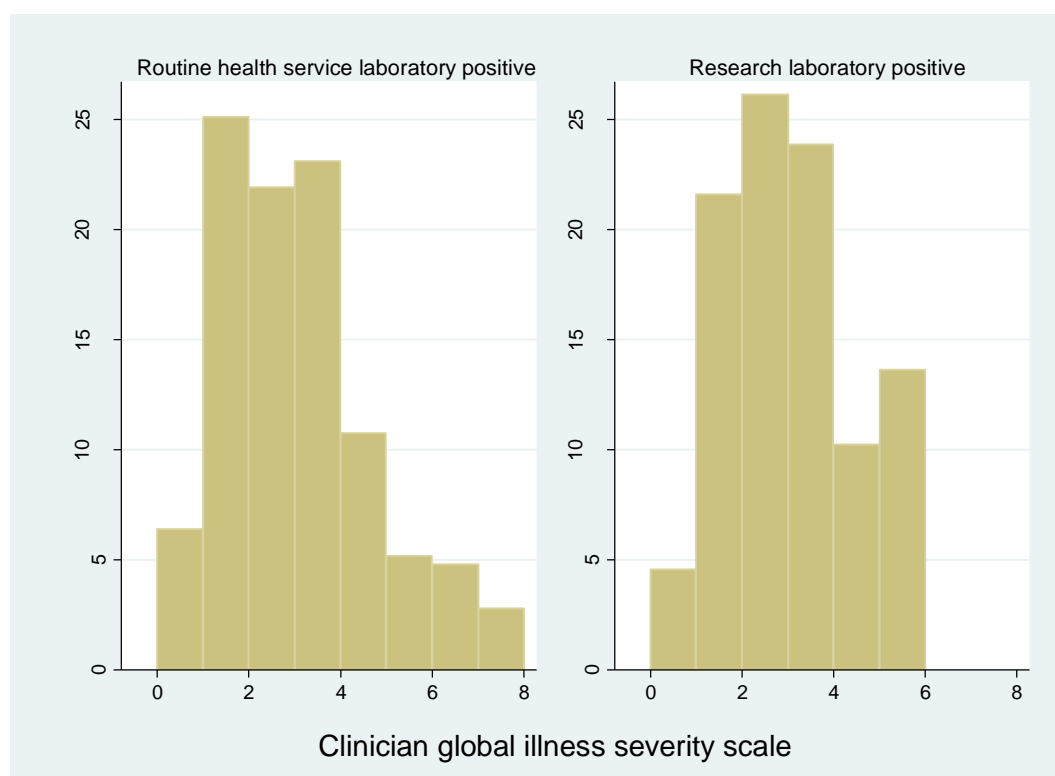

Notes: A score of 0 meant the child was completely well and a score of 10 meant that the child was extremely unwell. The median (interquartile range) of the score was 2 (1-3) for both NHS and research laboratory UTI positive.
