# Supplementary material for: Comparison of microbiological diagnosis of urinary tract infection in young children by routine health service laboratories and a research laboratory: Diagnostic cohort study
Source: PLOS journal article supplement (doi:10.1371/journal.pone.0171113), 2017-02-15
Supplement: S3 (10.1371/journal.pone.0171113.s003) [file journal.pone.0171113.s003]

**S1 Table. Routine health service laboratory Standard Operating Procedures**

|                                                                                                                                                       |            |                   |            |       |
|-------------------------------------------------------------------------------------------------------------------------------------------------------|------------|-------------------|------------|-------|
| <i>Microscopy: Standards Unit, Microbiology Services Division, HPA Bacteriology   B 41   Issue no: 7.1   Issue date: 13.08.12</i>                     | Manual     | Automated         | Dipstix    |       |
| Number of laboratories using method                                                                                                                   | 16         | 8                 | 2*         |       |
| <i>Culture Method: Standards Unit, Microbiology Services Division, HPA Bacteriology   B 41   Issue no: 7.1   Issue date: 13.08.12</i>                 | Paper foot | Calibrated loop   | Multipoint |       |
| Number of laboratories using method                                                                                                                   | 4          | 19                | 2          |       |
| <i>Culture Media: Standards Unit, Microbiology Services Division, HPA Bacteriology   B 41   Issue no: 7.1   Issue date: 13.08.12</i>                  | CLED       | Chromogenic media | Both       |       |
| Number of laboratories using media                                                                                                                    | 7          | 14                | 4          |       |
| <i>Calibrated loop culture volume: Standards Unit, Microbiology Services Division, HPA Bacteriology   B 41   Issue no: 7.1   Issue date: 13.08.12</i> | 1uL        | 2uL               | 3uL        | 10uL  |
| Number of laboratories using volume                                                                                                                   | 11         | 5                 | 2          | 1     |
| <i>Calibrated loop culture volume: Standards Unit, Microbiology Services Division, HPA Bacteriology   B 41   Issue no: 7.1   Issue date: 13.08.12</i> | 1/4        | 1/3               | 1/2        | Whole |
| Number of laboratories using plate area                                                                                                               | 13         | 2                 | 3          | 1     |

\* One laboratory uses Dipstix as well as manual microscopy

All participating laboratory methods were a variation on the Standard Microbiology Investigation (SMI) B41 guidelines. Based on 25 NHS laboratory Standard Operating procedures (SOPs) available.
