# Supplementary material for: Comparison of microbiological diagnosis of urinary tract infection in young children by routine health service laboratories and a research laboratory: Diagnostic cohort study
Source: PLOS journal article supplement (doi:10.1371/journal.pone.0171113), 2017-02-15
Supplement: S4 (10.1371/journal.pone.0171113.s004) [file journal.pone.0171113.s004]

**S2 Table. Research laboratory Standard Operating Procedures**

|                                      |                                             |
|--------------------------------------|---------------------------------------------|
| <u>Microscopy:</u>                   | Automated                                   |
| <u>Antimicrobial substance assay</u> | Phenotypic                                  |
| <u>Culture Method:</u>               | Precise colony counts<br>from spiral plater |
| <u>Culture Media:</u>                |                                             |
| Total count from                     | Columbia blood agar                         |
| Species specific count from          | Chromogenic media                           |
| <u>Culture volume:</u>               | 50uL                                        |
| <u>Culture plate</u>                 | Whole                                       |
