# Supplementary material for: Comparison of microbiological diagnosis of urinary tract infection in young children by routine health service laboratories and a research laboratory: Diagnostic cohort study
Source: PLOS journal article supplement (doi:10.1371/journal.pone.0171113), 2017-02-15
Supplement: S7 (10.1371/journal.pone.0171113.s007) [file journal.pone.0171113.s007]

**S5 Table. Areas under the ROC curve from logistic regression models**

| Characteristic of stratified analysis or definition of UTI positivity                            | Clean catch   |                    | Nappy pad     |                    |
|--------------------------------------------------------------------------------------------------|---------------|--------------------|---------------|--------------------|
|                                                                                                  | N obs (N +ve) | AUC (95% CI)       | N obs (N +ve) | AUC (95% CI)       |
| Routine health service laboratory positive, age <3 years                                         | 758 (45)      | 0.75 (0.67, 0.84)  | 2126 (144)    | 0.66 (0.61, 0.71)  |
| Routine health service laboratory positive, age ≥3 years                                         | 1861 (59)     | 0.74 (0.67, 0.81)  | 63 (3)        | Too few            |
| Routine health service laboratory positive, age< 3 years, with “not known”±                      | 758 (45)      | 0.76 (0.68, 0.85)  | 2126 (144)    | 0.66 (0.61, 0.71)  |
| Research laboratory positive age <3 years                                                        | 758 (22)      | 0.88 (0.80, 0.97)  | 2126 (29)     | 0.79 (0.70, 0.88)  |
| Research laboratory positive age ≥3 years                                                        | 1861 (37)     | 0.85 (0.77, 0.94)  | 63 (0)        | Too few            |
| Research laboratory positive age< 3 years, with “not known” ±                                    | 758 (22)      | 0.89 (0.81, 0.98)  | 2126 (29)     | 0.81 (0.72, 0.89)  |
| Routine health service laboratory positive, surgery sample                                       | 2012 (84)     | 0.73 (0.67, 0.80)  | 935 (64)      | 0.66 (0.58, 0.73)  |
| Routine health service laboratory positive, home sample                                          | 607 (20)      | 0.81 (0.71, 0.92)  | 1254 (83)     | 0.66 (0.59, 0.72)  |
| Research laboratory positive, surgery sample                                                     | 2012 (47)     | 0.90 (0.84, 0.96)  | 935 (12)      | 0.84 (0.73, 0.95)† |
| Research laboratory positive, home sample                                                        | 607 (12)      | 0.73 (0.55, 0.90)† | 1254 (17)     | 0.76 (0.64, 0.89)† |
| Routine health service laboratory positive, sample receipt <24 hours                             | 1959 (76)     | 0.76 (0.69, 0.82)  | 1518 (108)    | 0.67 (0.31, 0.72)  |
| Routine health service laboratory positive, sample receipt ≥24 hours                             | 660 (28)      | 0.73 (0.64, 0.83)  | 671 (39)      | 0.62 (0.53, 0.70)† |
| Research laboratory positive, sample receipt <24 hours                                           | 794 (15)      | 0.89 (0.77, 1.00)  | 630 (7)       | 0.94 (0.87, 1.00)† |
| Research laboratory positive, sample receipt ≥24 hours                                           | 1825 (44)     | 0.84 (0.76, 0.92)  | 1559 (22)     | 0.75 (0.64, 0.86)† |
| Routine health service laboratory pure/predominant growth ≥10 <sup>5</sup> CFU                   | 2619 (104)    | 0.75 (0.69, 0.80)  | 2189 (147)    | 0.65 (0.61, 0.70)  |
| Routine health service laboratory pure/predominant growth ≥10 <sup>3</sup> -<10 <sup>5</sup> CFU | 2515 (47)     | 0.58 (0.51, 0.66)† | 2042 (40)     | 0.57 (0.48, 0.65)† |
| Research laboratory p/p ≥10 <sup>7</sup> CFU                                                     | 2593 (33)     | 0.89 (0.81, 0.97)  | 2166 (6)      | 0.74 (0.60, 0.89)† |
| Research laboratory p/p ≥10 <sup>6</sup> -<10 <sup>7</sup> CFU                                   | 2573 (13)     | 0.84 (0.70, 0.98)  | 2166 (6)      | 0.96 (0.92, 1.00)† |
| Research laboratory p/p ≥10 <sup>5</sup> -<10 <sup>6</sup> CFU                                   | 2573 (13)     | 0.79 (0.64, 0.94)  | 2169 (9)      | 0.81 (0.68, 0.94)† |
| Research laboratory p/p ≥10 <sup>4</sup> -<10 <sup>5</sup> CFU                                   | 2560 (24)     | 0.59 (0.51, 0.68)† | 2160 (61)     | 0.59 (0.54, 0.64)† |
| Research laboratory p/p ≥10 <sup>3</sup> -<10 <sup>4</sup> CFU                                   | 2560 (110)    | 0.57 (0.52, 0.62)  | 2160 (93)     | 0.61 (0.56, 0.66)  |
| Routine health service laboratory positive and WBC <sup>#</sup> ≥30/mm <sup>3</sup>              | 2572 (57)     | 0.85 (0.79, 0.91)  | 2068 (26)     | 0.74 (0.62, 0.86)  |
| Routine health service laboratory positive and WBC <sup>#</sup> <30/mm <sup>3</sup>              | 2562 (47)     | 0.63 (0.55, 0.71)  | 2163 (121)    | 0.64 (0.59, 0.69)  |
| Research laboratory positive and WBC <sup>#</sup> ≥30/mm <sup>3</sup>                            | 2599 (39)     | 0.97 (0.93, 1.00)  | 2164 (4)      | 0.79 (0.48, 1.00)† |
| Research laboratory positive and WBC <sup>#</sup> <30/mm <sup>3</sup>                            | 2580 (20)     | 0.67 (0.54, 0.81)† | 2185 (25)     | 0.80 (0.71, 0.89)† |
| Research laboratory pure growth ≥10 <sup>5</sup> CFU                                             | 2604 (44)     | 0.84 (0.76, 0.92)  | 2172 (12)     | 0.83 (0.72, 0.94)† |
| Research laboratory predominant growth ≥10 <sup>5</sup> CFU                                      | 2575 (15)     | 0.92 (0.84, 1.00)  | 2177 (17)     | 0.76 (0.64, 0.89)† |

± Including “not known” responses for “Pain/crying when passing urine” and “Passing urine more often”; †Not all variables included because of perfect prediction;

# WBC: white blood cell count.
